# Supplementary material for: Engineering a surface functionalized Pt@SnS2/Ti3C2Tx MXene sensor with humidity tolerance and high sensitivity at room temperature for NH3 detection
Source: Royal Society of Chemistry journal article supplement (doi:10.1039/d4ta07108e), 2024-12-18
Supplement: d4ta07108e1.pdf [file d4ta07108e1.pdf]

## Supporting Information

### Engineering a surface functionalized Pt@SnS<sub>2</sub>/Ti<sub>3</sub>C<sub>2</sub>T<sub>x</sub> MXene sensor with humidity tolerance and high sensitivity at room temperature for NH<sub>3</sub> detection

*Kugalur Shanmugam Ranjith<sup>a,\*</sup>, Sonam Sonwal<sup>b</sup>, Ali Mohammadi<sup>a</sup>, Ganji Seeta Rama Raju<sup>a</sup>, Yun Suk Huh<sup>b,\*</sup>, Young-Kyu Han<sup>a,\*</sup>*

<sup>a</sup>Department of Energy and Material Engineering, Dongguk University-Seoul, Seoul 04620, South Korea

<sup>b</sup>Department of Biological Engineering, Inha University, Incheon 22212, South Korea

\*Corresponding authors: [ranjuphy@gmail.com](mailto:ranjuphy@gmail.com) (K. S. Ranjith), [yunsuk.huh@inha.ac.kr](mailto:yunsuk.huh@inha.ac.kr) (Y. S. Huh), [ykenegy@dongguk.edu](mailto:ykenegy@dongguk.edu) (Y.-K. Han)

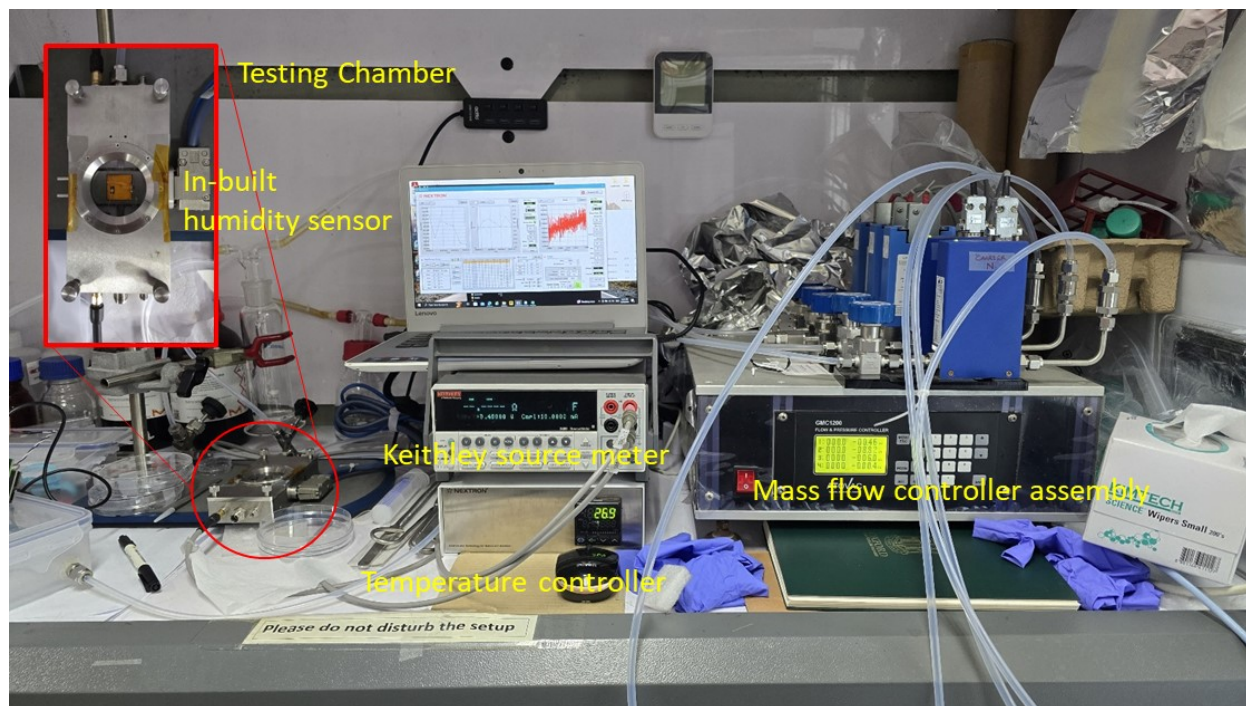

**Fig. S1** The sensing setup assembly of Nextron microprobe system coupled with Keithley 2400 for the room temperature  $\text{NH}_3$  sensing.

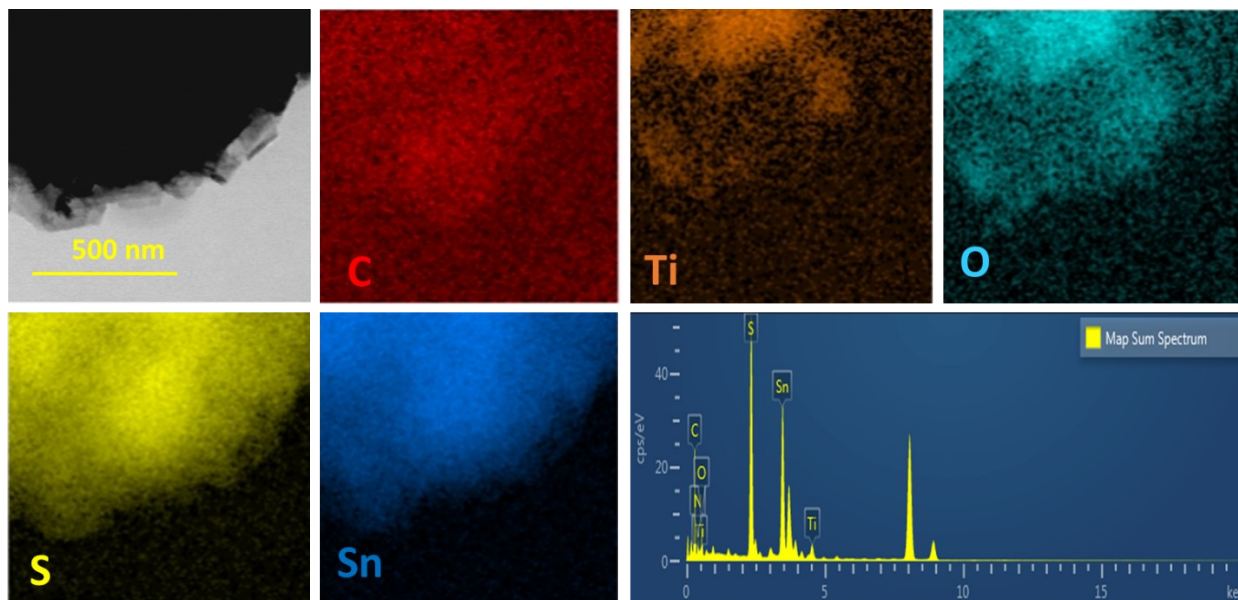

**Fig. S2** The STEM and EDX mapping analysis of the SnS<sub>2</sub>/MXene heterostructures.

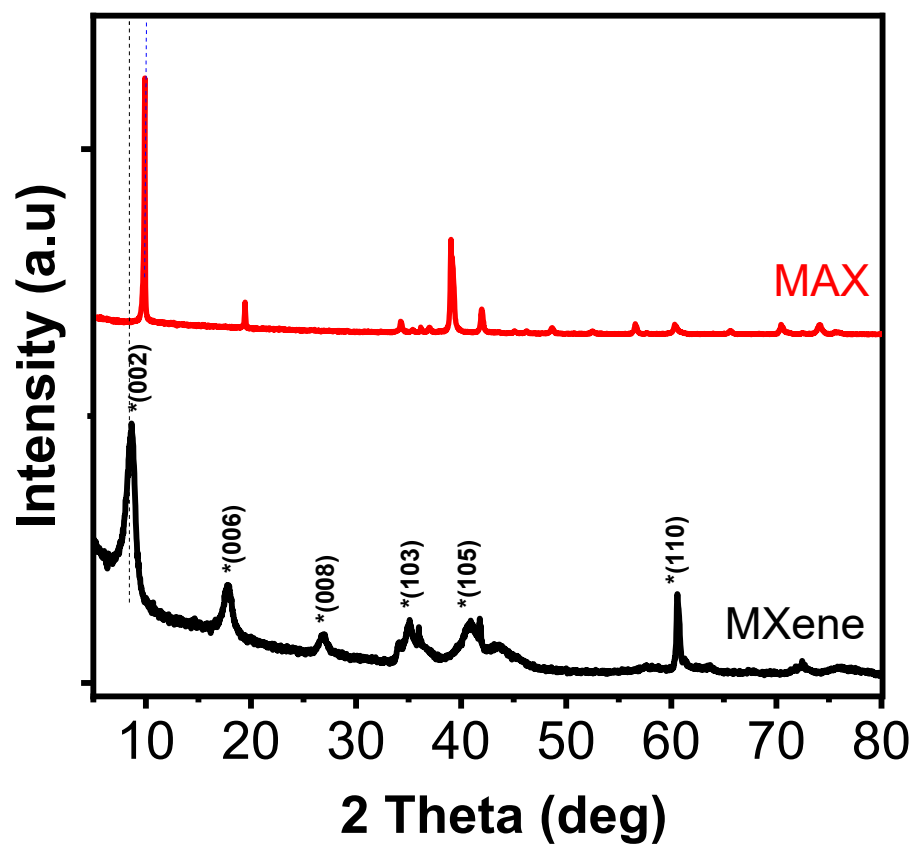

**Fig. S3** XRD spectra of the MAX and MXene samples.

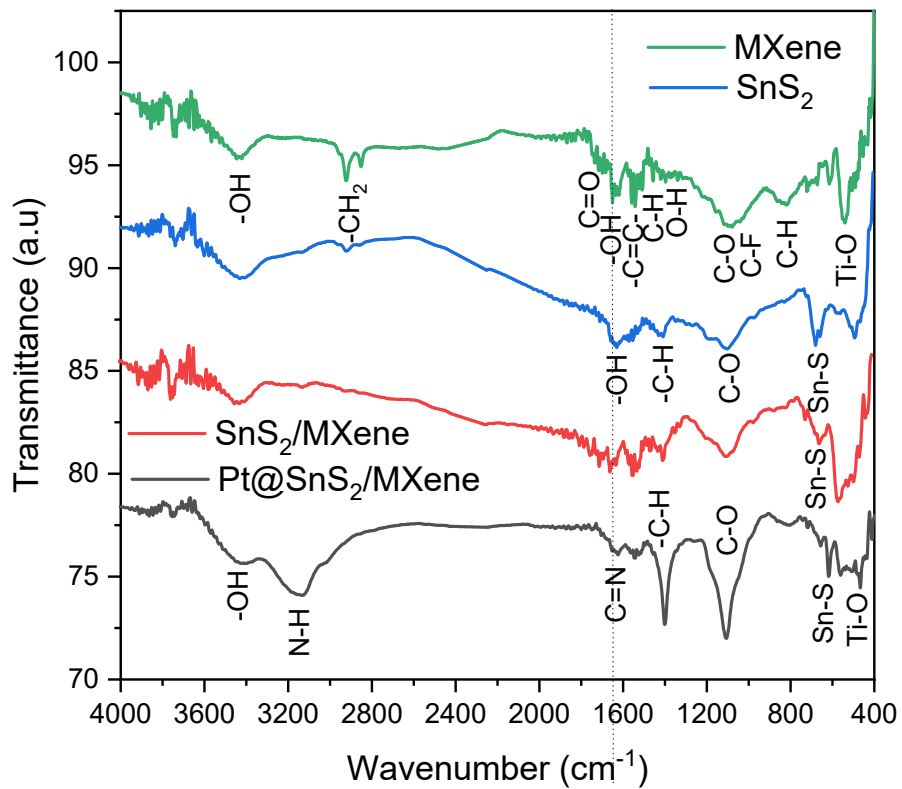

**Fig. S4** The FTIR spectra of the MXene-based heterostructure samples.

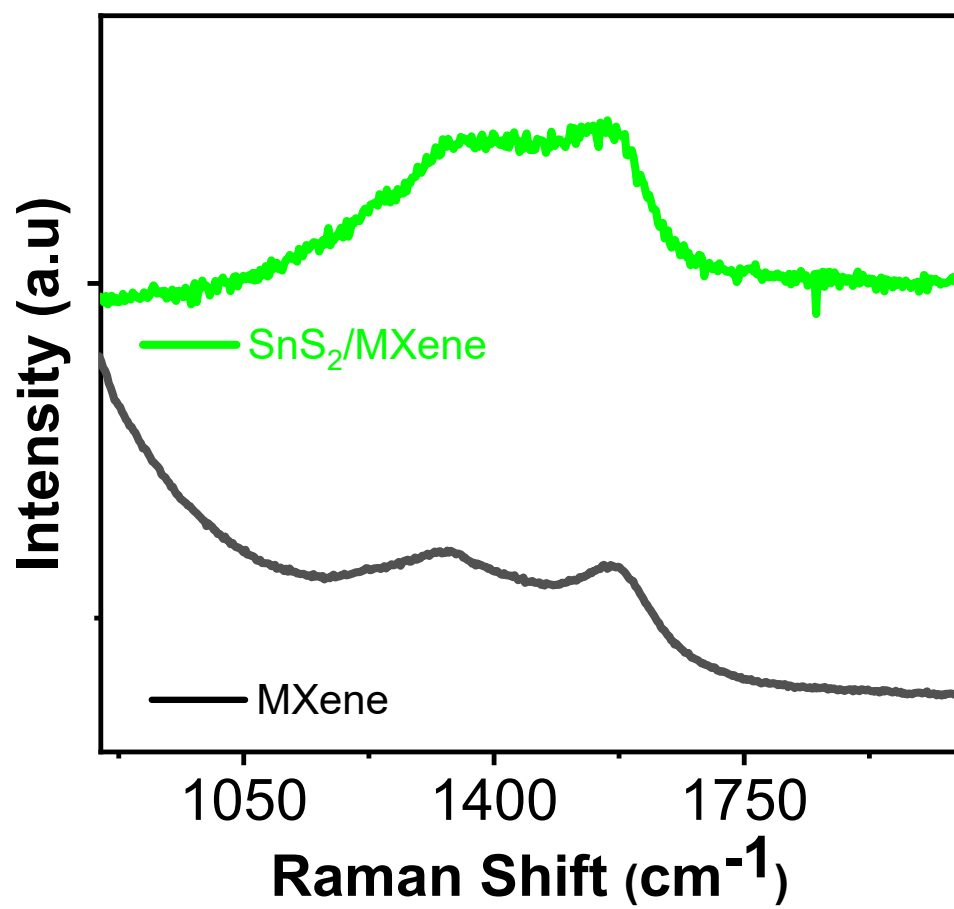

**Fig. S5** The RAMAN spectra of the MXene and SnS<sub>2</sub>/MXene samples.

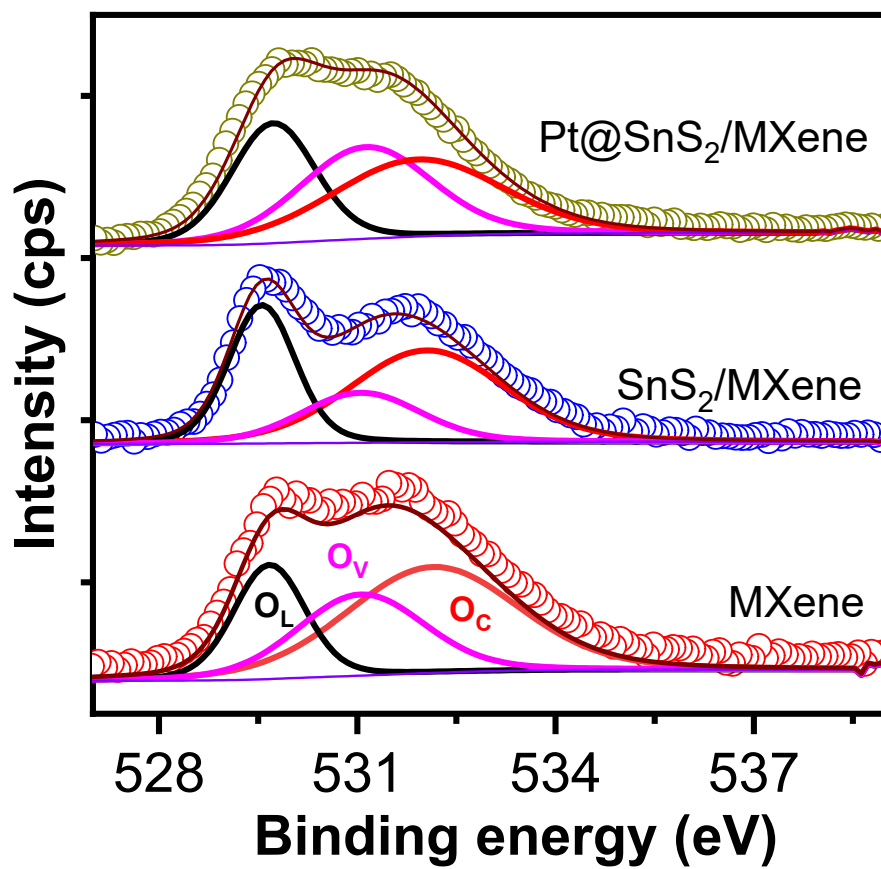

**Fig. S6** The O 1s XPS spectra of the MXene-based heterostructures.

**Table S1.** Comparing the Oxygen related energy states in different heterostructure samples

| Sample                     | Lattice oxygen ( $O_L$ ) Binding energy (eV) | Area    | Oxygen vacancy ( $O_V$ ) Binding energy (eV) | Area    | Chemisorbed oxygen ( $O_C$ ) Binding energy (eV) | Area    |
|----------------------------|----------------------------------------------|---------|----------------------------------------------|---------|--------------------------------------------------|---------|
| MXene                      | 529.9                                        | 10621.5 | 531.4                                        | 13411.3 | 532.6                                            | 23583.3 |
| SnS <sub>2</sub> /MXene    | 530.1                                        | 10345.6 | 531.6                                        | 6683.6  | 532.6                                            | 15903.5 |
| Pt@SnS <sub>2</sub> /MXene | 530.3                                        | 14945.1 | 531.7                                        | 17962.8 | 532.5                                            | 19450.1 |



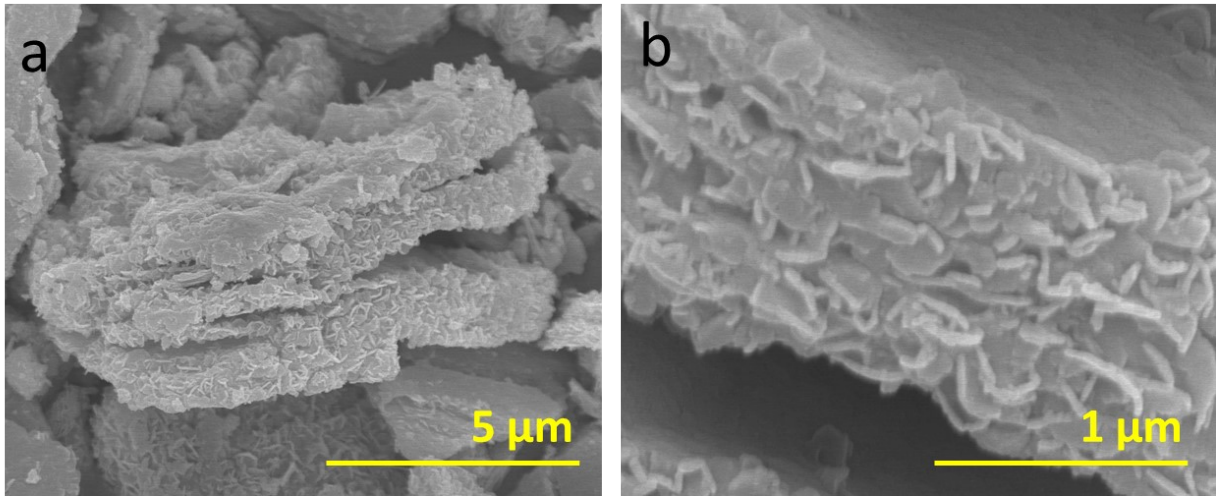

**Fig. S7** The SEM images of the SAM-functionalized Pt@SnS<sub>2</sub>/MXene heterostructures.

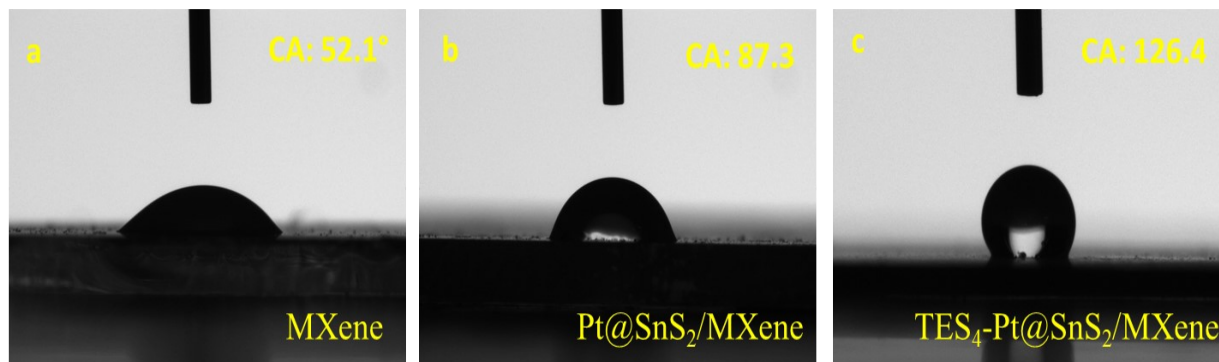

**Fig. S8** The water contact angle of the (a) MXene, (b) Pt@SnS<sub>2</sub>/MXene, and (c) TES<sub>4</sub>-Pt@SnS<sub>2</sub>/MXene heterostructures.

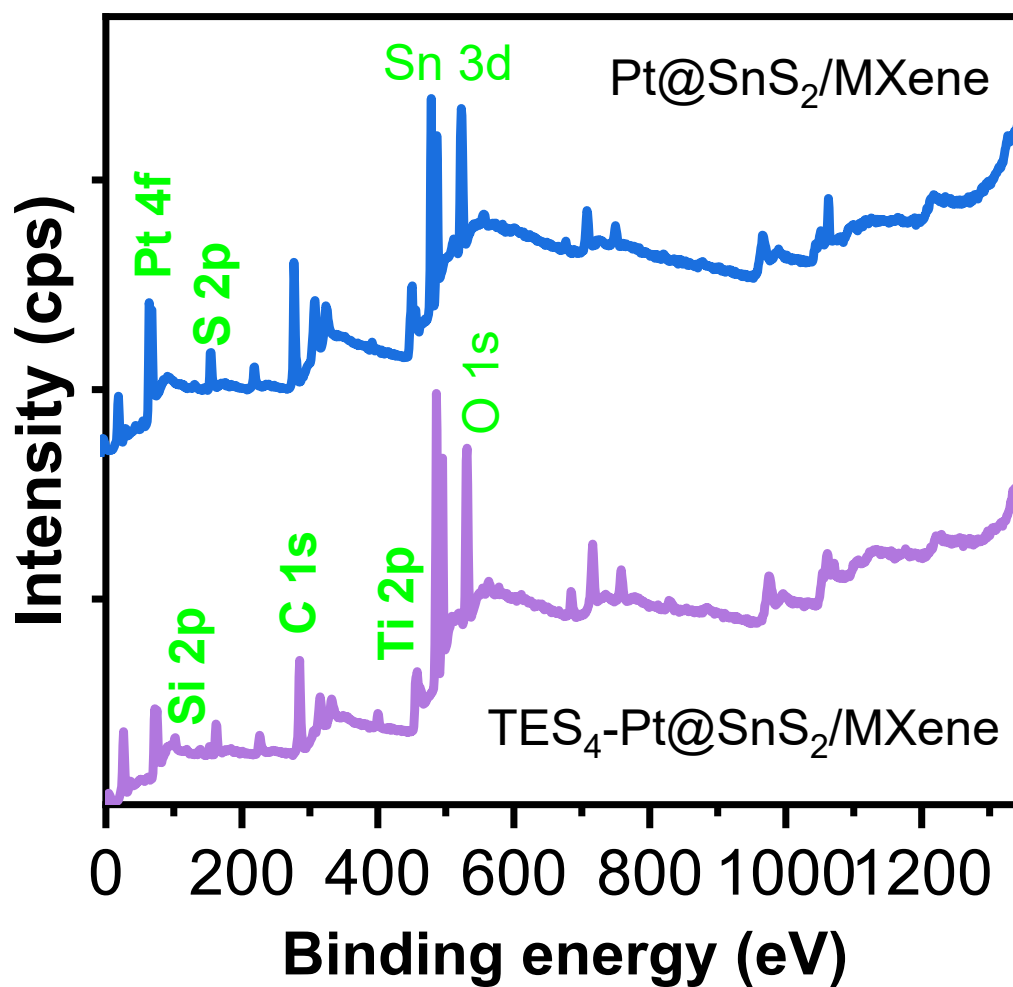

Fig. S9 The XPS survey spectrum of the Pt@SnS<sub>2</sub>/MXene, and TES<sub>4</sub>-Pt@SnS<sub>2</sub>/MXene samples.

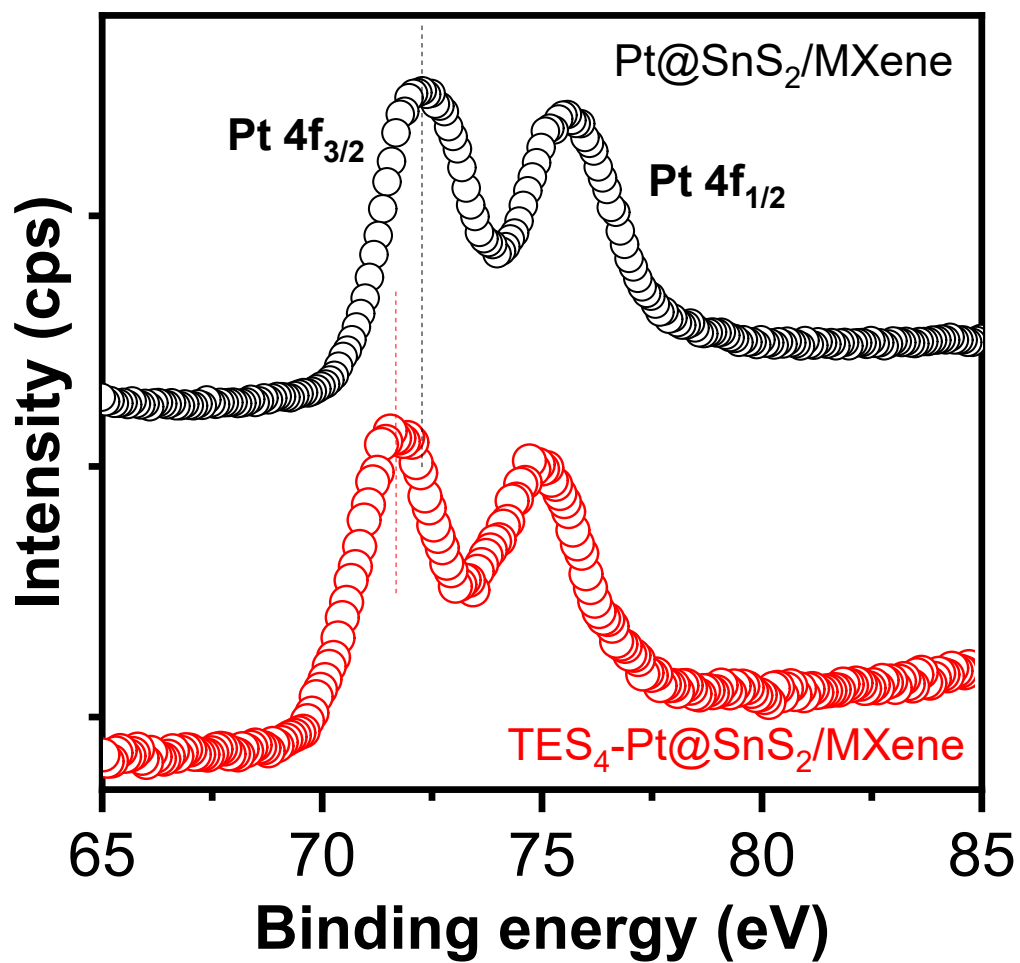

**Fig. S10** The XPS Pt 4f spectra of the Pt@SnS<sub>2</sub>/MXene, and TES<sub>4</sub>-Pt@SnS<sub>2</sub>/MXene samples.

**Table S2.** The Sensing response difference on the different SnS<sub>2</sub>/MXene and different loading densities of Pt on SnS<sub>2</sub>/MXene

| Sample                         | Baseline resistance      | Response |
|--------------------------------|--------------------------|----------|
| MXene                          | 7.89E <sup>-3</sup> Ohm  | 1.57     |
| 10wt%SnS <sub>2</sub> /MXene   | 9.89E <sup>-4</sup> Ohm  | 1.83     |
| 20wt%SnS <sub>2</sub> /MXene   | 8.89E <sup>-6</sup> Ohm  | 2.37     |
| 30wt%SnS <sub>2</sub> /MXene   | 12.18E <sup>-6</sup> Ohm | 2.84     |
| 40wt%SnS <sub>2</sub> /MXene   | 32.82E <sup>-6</sup> Ohm | 2.45     |
| 1wt%Pt@SnS <sub>2</sub> /MXene | 7.43E <sup>-6</sup> Ohm  | 3.72     |
| 2wt%Pt@SnS <sub>2</sub> /MXene | 1.51E <sup>-6</sup> Ohm  | 6.91     |
| 3wt%Pt@SnS <sub>2</sub> /MXene | 6.32E <sup>-6</sup> Ohm  | 5.27     |
| 4wt%Pt@SnS <sub>2</sub> /MXene | 8.89E <sup>-5</sup> Ohm  | 3.46     |

For Pt loading the 30wt%SnS<sub>2</sub>/MXene is considered as optimum sample

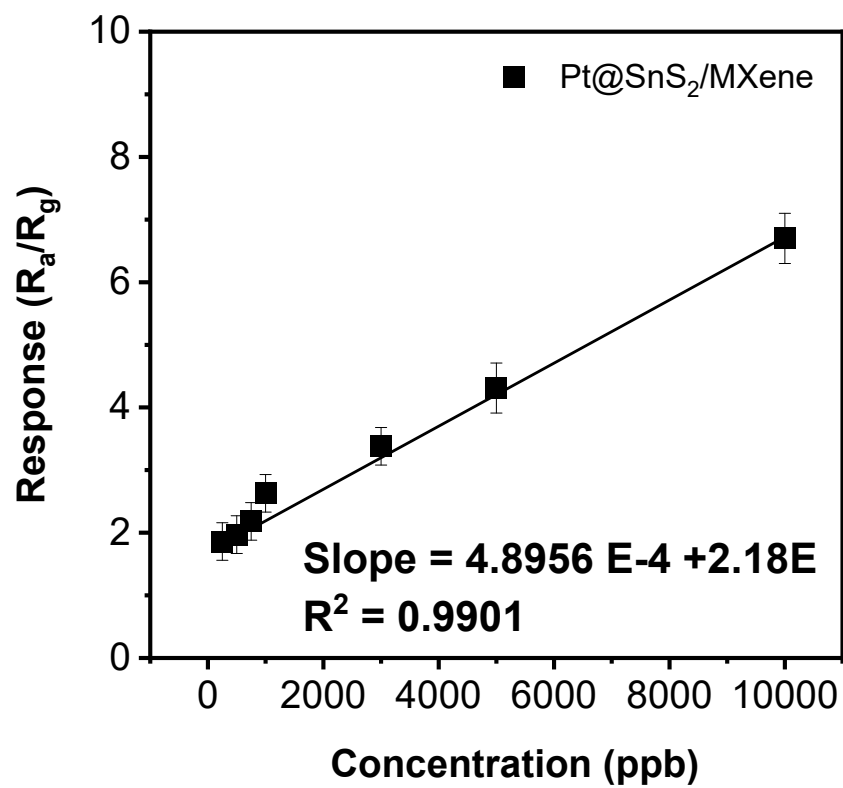

**Fig. S11** The linear response to NH<sub>3</sub> with different concentrations on the Pt@SnS<sub>2</sub>/MXene sensor.

**Table S3.** The Sensing result comparison of the MXene-based sensors reported in recent years.

| Material                                                                          | Temp | Analyte         | Concentration | Response           | LOD        | Reference    |
|-----------------------------------------------------------------------------------|------|-----------------|---------------|--------------------|------------|--------------|
| Ti <sub>3</sub> C <sub>2</sub> T <sub>x</sub> -F                                  | RT   | Ethanol         | 5 ppm         | 2.1 <sup>a</sup>   |            | [1]          |
| Ni <sub>3</sub> (HITP) <sub>2</sub> /MXene                                        | RT   | NH <sub>3</sub> | 10 ppm        | 9.46               | 0.25 ppm   | [2]          |
| Ni <sub>3</sub> (HITP) <sub>2</sub> /MXene                                        | RT   | EtOH            | 10 ppm        | 28.8               | 0.005 ppm  | [2]          |
| MoO <sub>3</sub> /TiO <sub>2</sub> /Ti <sub>3</sub> C <sub>2</sub> T <sub>x</sub> | RT   | IPA             | 50 ppm        | 245%               | --         | [3]          |
| MXene/TiO <sub>2</sub>                                                            | RT   | NH <sub>3</sub> | 10 ppm        | 3.1%               | --         | [4]          |
| MXene/SnO <sub>2</sub>                                                            | RT   | NH <sub>3</sub> | 50 ppm        | 40%                | --         | [5]          |
| In <sub>2</sub> O <sub>3</sub> /Ti <sub>3</sub> C <sub>2</sub> T <sub>x</sub>     | RT   | Methanol        | 5 ppm         | 29.6%              | --         | [6]          |
| Ti <sub>3</sub> C <sub>2</sub> T <sub>x</sub> -ZnO                                | RT   | NO <sub>2</sub> | 20 ppm        | 78.6%              | --         | [7]          |
| V <sub>2</sub> CT <sub>x</sub> @MoS <sub>2</sub>                                  | RT   | NH <sub>3</sub> | 1 ppm         | 8.71%              | 0.129 ppm  | [8]          |
| Ti <sub>3</sub> C <sub>2</sub> T <sub>x</sub> /TiO <sub>2</sub> /MoS <sub>2</sub> | RT   | NH <sub>3</sub> | 100 ppm       | 163.3%             | 0.5 ppm    | [9]          |
| Ti <sub>3</sub> C <sub>2</sub> T <sub>x</sub> /graphene                           | RT   | NH <sub>3</sub> | 100 ppm       | 7.2%               | 10 ppm     | [10]         |
| MXene/CuO                                                                         | --   | NH <sub>3</sub> | 100 ppm       | 24.8%              | 1 ppm      | [11]         |
| Ti <sub>3</sub> C <sub>2</sub> T <sub>x</sub> /SnO                                | --   | NH <sub>3</sub> | 10 ppm        | 67%                | 1 ppm      | [12]         |
| BiOCl/MXene                                                                       | RT   | NO <sub>2</sub> | 100 ppm       | 34.58 <sup>b</sup> | 0.03 ppm   | [13]         |
| WO <sub>3</sub> /Ti <sub>3</sub> C <sub>2</sub> T <sub>x</sub>                    | RT   | NO <sub>2</sub> | 200 ppb       | 145% <sup>a</sup>  | --         | [14]         |
| Pt SA-Ti <sub>3</sub> C <sub>2</sub> T <sub>x</sub>                               | RT   | TEA             | 2 ppm         | 175% <sup>a</sup>  | --         | [15]         |
| Co-TCPP(Fe)/Ti <sub>3</sub> C <sub>2</sub> T <sub>x</sub> -<br>20                 | RT   | NO              | 5 ppm         | 1.55 <sup>b</sup>  | 0.2 ppm    | [16]         |
| MOF-MXene                                                                         | RT   | NH <sub>3</sub> | 10 ppm        | 13.37 <sup>a</sup> | 0.0128 ppm | [17]         |
| Pt@SnS <sub>2</sub> /MXene                                                        | RT   | NH <sub>3</sub> | 10 ppm        | 6.72 <sup>b</sup>  | 0.082 ppm  | This<br>work |
| TES <sub>4</sub> -Pt@SnS <sub>2</sub> /MXene                                      | RT   | NH <sub>3</sub> | 10 ppm        | 22.7 <sup>b</sup>  | 0.023 ppm  | This<br>work |

<sup>a</sup>Response (%) =  $(I_g - I_0)/I_0 \times 100$  or  $(R_g - R_0)/R_0 \times 100$ , <sup>b</sup>Response =  $I_g/I_0$

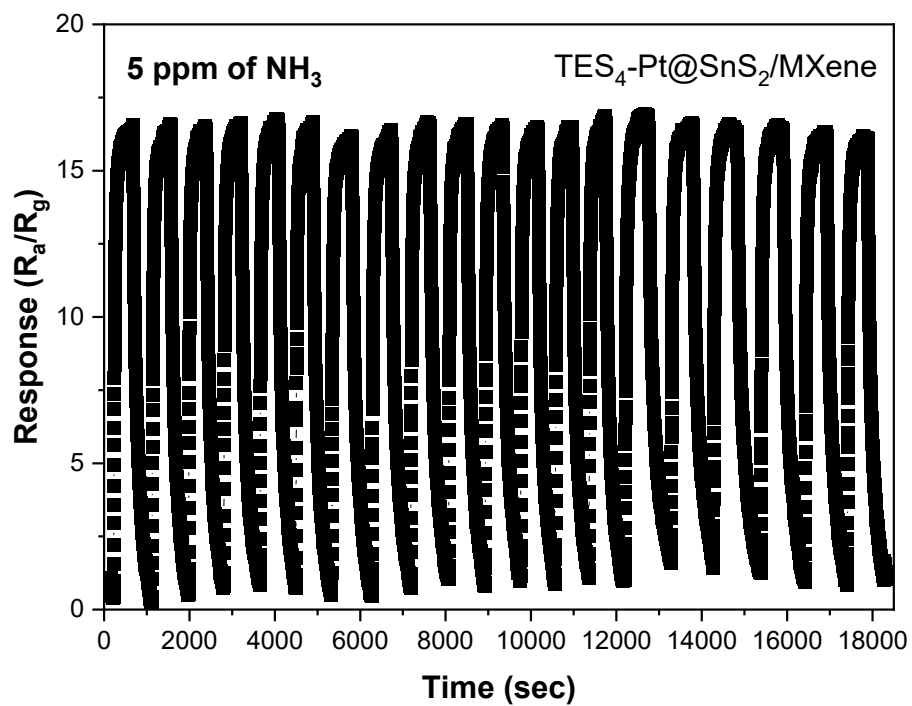

**Fig. S12** Reproducibility of the TES<sub>4</sub>-Pt@SnS<sub>2</sub>/MXene sensor to 5 ppm of NH<sub>3</sub> at RT.



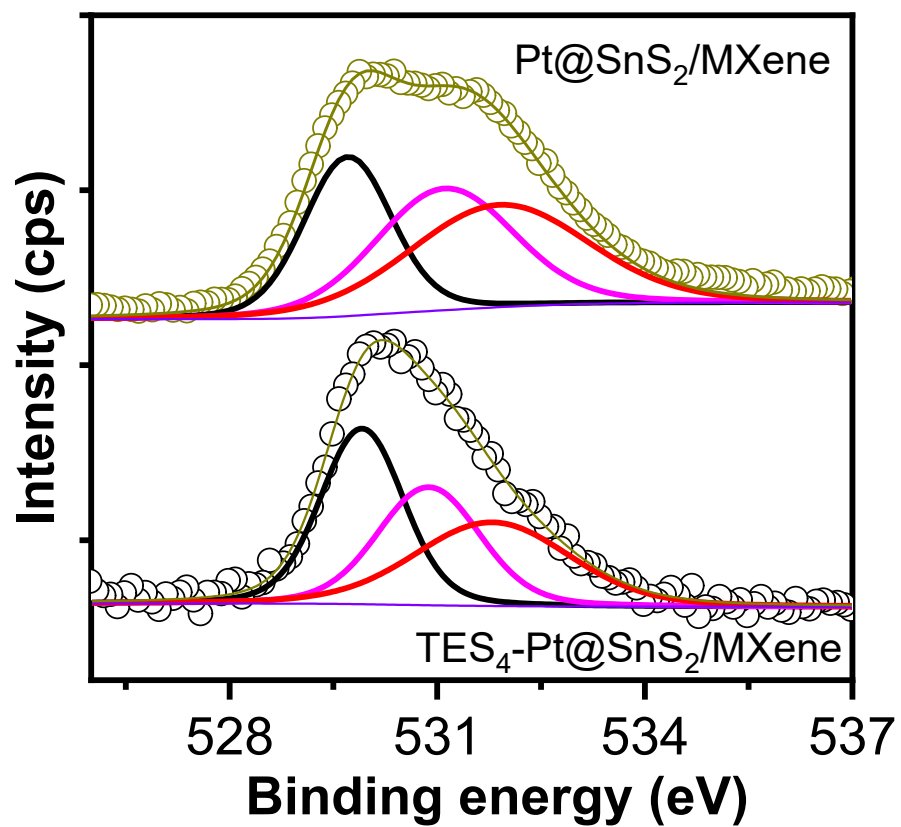

**Fig. S13** The ex-situ XPS spectra of O 1s before and after the adsorption of NH<sub>3</sub> on the TES<sub>4</sub>-Pt@SnS<sub>2</sub>/MXene sample.

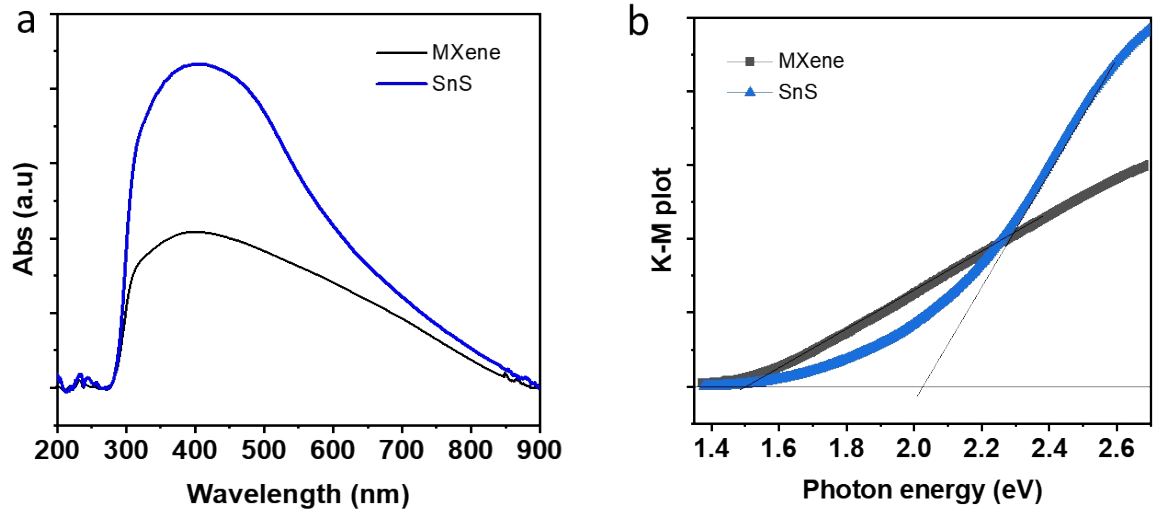

**Fig. S14** (a) The UV vis absorption spectra and (b) K-M plot of the MXene and SnS<sub>2</sub> nanostructures.

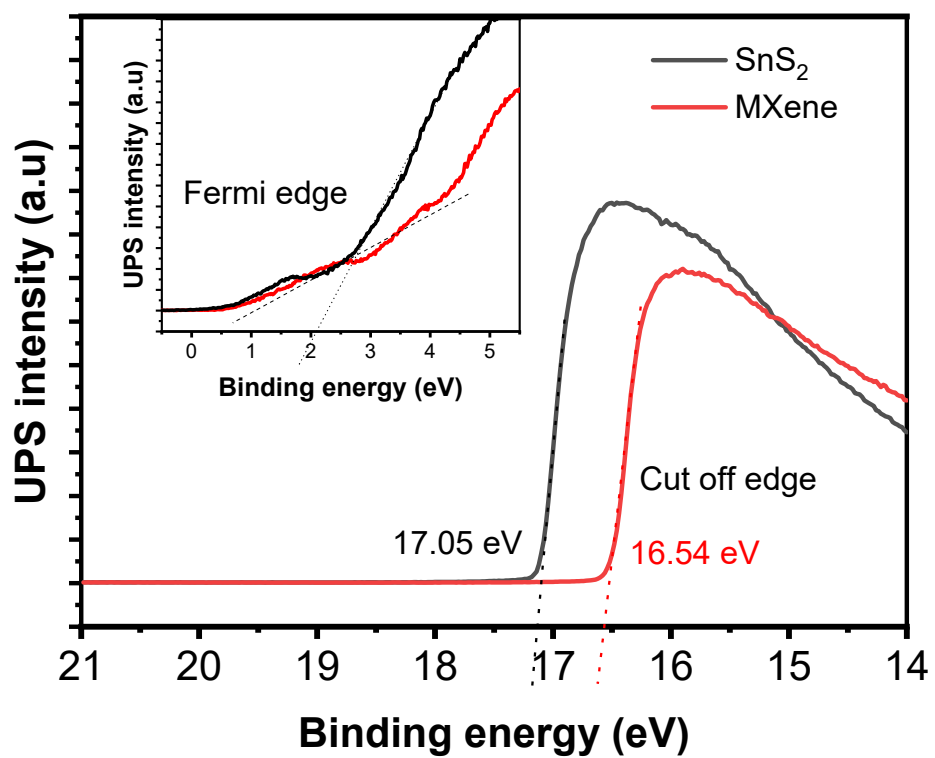

**Fig. S15** The UPS spectra of the MXene and SnS<sub>2</sub> nanostructures.

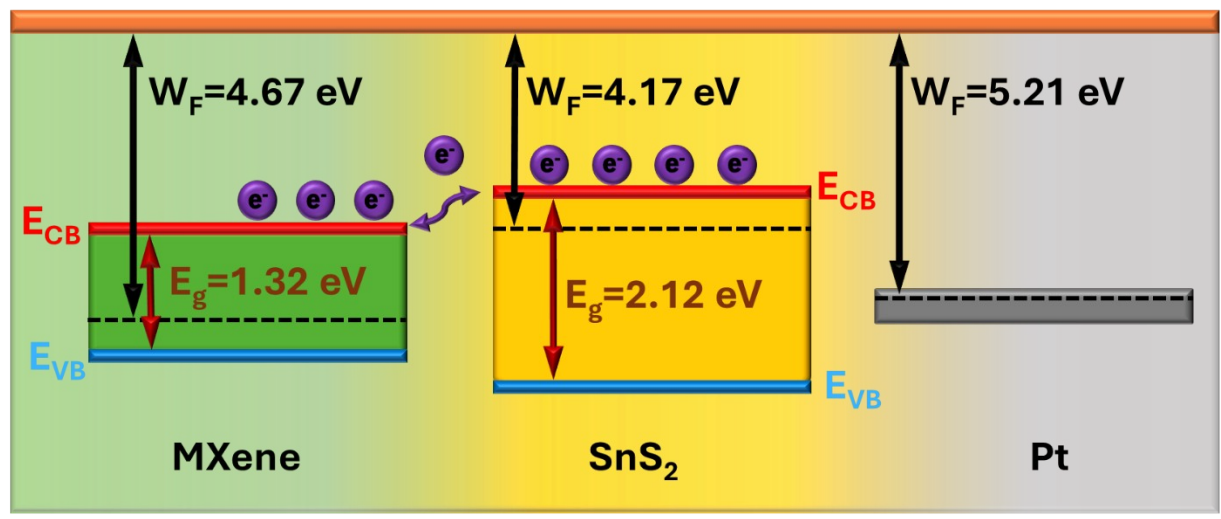

**Fig. S16** Energy band structure of the MXene, SnS<sub>2</sub> with the Pt interface.

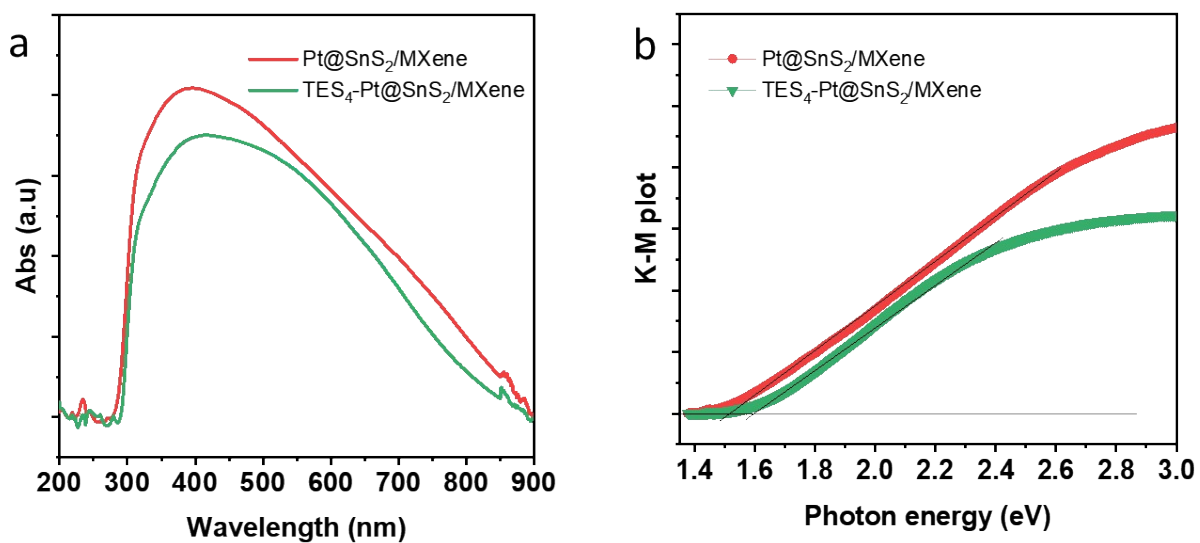

**Fig. S17** (a) The UV vis absorption spectra and (b) K-M plot of the Pt@SnS<sub>2</sub>/MXene and TES<sub>4</sub>-Pt@SnS<sub>2</sub>/MXene heterostructures.

## References

1. W. Y. Chen, S. N. Lai, C. C. Yen, X. Jiang, D. Peroulis, L. A. Stanciu, Surface Functionalization of  $\text{Ti}_3\text{C}_2\text{T}_x$  MXene with Highly Reliable Superhydrophobic Protection for Volatile Organic Compounds Sensing, *ACS Nano*, 2020, **14**, 11490–11501. <https://doi.org/10.1021/acsnano.0c03896>.
2. X. Wu, M. Niu, X. Tian, X. Peng, P. J. S. Buenconsej, X. Wu, Y. Wang, W. Ji, Y. Li, J. Qiao, J. Tao, M. Zhang, S. Xiao, H. Yuan, Solution-processable  $\text{Ni}_3(\text{HITP})_2/\text{MXene}$  heterostructures for ppb-level gas detection, *J. Mater. Chem. A*, 2024, **12**, 17382-17394. <https://doi.org/10.1039/D4TA02438A>.
3. Y. Yao, Y. Han, M. Zhou, L. Xie, X. Zhao, Z. Wang, N. Barsan, Z. Zhu,  $\text{MoO}_3/\text{TiO}_2/\text{Ti}_3\text{C}_2\text{T}_x$  nanocomposite based gas sensors for highly sensitive and selective isopropanol detection at room temperature, *J. Mater. Chem. A*, 2022, **10**, 8283-8292. <https://doi.org/10.1039/D1TA11018G>.
4. H. Tai, Z. Duan, Z. He, X. Li, J. Xu, B. Liu, Y. Jiang, Enhanced ammonia response of  $\text{Ti}_3\text{C}_2\text{T}_x$  nanosheets supported by  $\text{TiO}_2$  nanoparticles at room temperature, *Sensors and Actuators B: Chemical*, 2019, **298**, 126874, <https://doi.org/10.1016/j.snb.2019.126874>.
5. T. He, W. Liu, T. Lv, M. Ma, Z. Liu, A. Vasiliev, X. Li, MXene/ $\text{SnO}_2$  heterojunction based chemical gas sensors, *Sensors and Actuators B: Chemical*, 2021, **329**, 129275. *5Sens. Actuators, B*, 2021, **329**, 129275. <https://doi.org/10.1016/j.snb.2020.129275>.
6. M. Liu, Z. Wang, P. Song, Z. Yang, Q. Wang,  $\text{In}_2\text{O}_3$  nanocubes/ $\text{Ti}_3\text{C}_2\text{T}_x$  MXene composites for enhanced methanol gas sensing properties at room temperature, *Ceramics International*, 2021, **47**, 23028-23037, *Ceram. Int.*, 2021, **47**, 23028-23037.
7. M. Luo, X. Huang, D. Xiong, S. Cai, S. Li, Z. Jia, Z. Gao, Fast response/recovery and sub-ppm ammonia gas sensors based on a novel  $\text{V}_2\text{CT}_x@\text{MoS}_2$  composite, *J. Mater. Chem. A*, 2024, **12**, 12225-12236. <https://doi.org/10.1039/D4TA00842A>.
8. X. Tian, L. Yao, X. Cui, R. Zhao, T. Chen, X. Xiao, Y. Wang, A two-dimensional  $\text{Ti}_3\text{C}_2\text{T}_x\text{MXene}@\text{TiO}_2/\text{MoS}_2$  heterostructure with excellent selectivity for the room temperature detection of ammonia, *J. Mater. Chem. A*, 2022, **10**, 5505-5519, <https://doi.org/10.1039/D1TA10773A>.
9. S. H. Lee, W. Eom, H. Shin, R. B. Ambade, J. H. Bang, H. W. Kim, T. H. Han, Room-

- Temperature, Highly Durable  $\text{Ti}_3\text{C}_2\text{T}_x$  MXene/Graphene Hybrid Fibers for  $\text{NH}_3$  Gas Sensing, *ACS Appl. Mater. Interfaces*. 2020, **12**, 10434–10442, <https://doi.org/10.1021/acsami.9b21765>.
10. X. Wang, L. Gong, Z. Li, Y. Yin, D. Zhang, A room temperature ammonia gas sensor based on cerium oxide/MXene and self-powered by a freestanding-mode triboelectric nanogenerator and its multifunctional monitoring application, *J. Mater. Chem. A*, 2023, **11**, 7690–7701. <https://doi.org/10.1039/D2TA07917H>.
  11. D. Wang, D. Zhang, Y. Yang, Q. Mi, J. Zhang, L. Yu, Multifunctional Latex/Polytetrafluoroethylene-Based Triboelectric Nanogenerator for Self-Powered Organ-like MXene/Metal–Organic Framework-Derived CuO Nanohybrid Ammonia Sensor, *ACS Nano* 2021, **15**, 2911–2919, <https://doi.org/10.1021/acsnano.0c09015>.
  12. L. Yao, X. Tian, X. Cui, R. Zhao, M. Xiao, B. Wang, X. Xiao, Y. Wang, Two-dimensional  $\text{Ti}_3\text{C}_2\text{T}_x$  MXene/SnO nanocomposites: Towards enhanced response and selective ammonia vapor sensor at room temperature, *Sensors and Actuators B: Chemical*, 2022, **358**, 131501, <https://doi.org/10.1016/j.snb.2022.131501>.
  13. J. Fan, J. Gao, H. Lv, L. Jiang, F. Qin, Y. Fan, B. Sun, J. Wang, M. Ikram, K. Shi. Synthesis and characterization of an ultra-thin BiOCl/MXene heterostructure for the detection of  $\text{NO}_2$  at room temperature with enhanced moisture resistance, *J. Mater. Chem. A*, 2022, **10**, 25714–25724. <https://doi.org/10.1039/D2TA07924K>.
  14. S. Gasso, A. Mahajan, Development of Highly Sensitive and Humidity Independent Room Temperature  $\text{NO}_2$  Gas Sensor Using Two Dimensional  $\text{Ti}_3\text{C}_2\text{T}_x$  Nanosheets and One Dimensional  $\text{WO}_3$  Nanorods Nanocomposite, *ACS Sens.* 2022, **7**, 2454–2464, <https://doi.org/10.1021/acssensors.2c01213>.
  15. B. Zong, Q. Xu, S. Mao, Single-Atom Pt-Functionalized  $\text{Ti}_3\text{C}_2\text{T}_x$  Field-Effect Transistor for Volatile Organic Compound Gas Detection, *ACS Sens.* 2022, **7**, 1874–1882, <https://doi.org/10.1021/acssensors.2c00475>.
  16. Y. Chang, M. Chen, Z. Fu, R. Lu, Y. Gao, F. Chen, H. Li, N. F. Rooij, Y. K. Lee, Y. Wang, G. Zhou, Building porphyrin-based MOFs on MXenes for ppb-level NO sensing, *J. Mater. Chem. A*, 2023, **11**, 6966–6977. <https://doi.org/10.1039/D3TA00072A>.
  17. K. S. Ranjith, S. Sonwal, A. Mohammadi, G. S. R. Raju, M. H. Oh, Y. S. Huh, Y. K. Han, Imparting hydrophobicity to a MOF on layered MXene for the selective, rapid, and ppb

level humidity-independent , detection of NH<sub>3</sub> at room temperature, *J. Mater. Chem. A*, 2024, **Advance Article**, <https://doi.org/10.1039/D4TA04656K>.
